# Supplementary material
Source: PubMed Central journal article supplement (PMC4002112)
Supplement: supp_M113.537449_jbc.M113.537449-1.pdf [file supp_M113.537449_jbc.M113.537449-1.pdf]

Table S1 : MS Identification of protein spots of 2D-PAGE

| protein ID | mass weight | pI   | peptide count | Mascot protein score | Mascot protein score C.I. % |
|------------|-------------|------|---------------|----------------------|-----------------------------|
| CysC       | 22503       | 5,25 | 4             | 93,7                 | 100                         |
| GamA       | 27271       | 5,81 | 6             | 80,8                 | 100                         |
| LiaH       | 25682       | 6,2  | 10            | 261                  | 100                         |
| LiaR       | 23110       | 5,13 | 12            | 158                  | 100                         |
| NadE       | 30376       | 5,07 | 16            | 456                  | 100                         |
| NrfA       | 28302       | 5,78 | 12            | 224                  | 100                         |
| PbpC       | 74360       | 6,24 | 19            | 373                  | 100                         |
| PspA       | 25125       | 5,87 | 12            | 85,1                 | 100                         |
| RpsB       | 27949       | 6,27 | 11            | 207                  | 100                         |
| YceC       | 21809       | 5,46 | 11            | 110                  | 100                         |
| YceH       | 41646       | 5,9  | 20            | 303                  | 100                         |
| YpuA       | 31275       | 4,51 | 38            | 20679*               | -                           |
| YqiG       | 40779       | 5,34 | 13            | 277                  | 100                         |
| YtrE       | 25444       | 5,99 | 13            | 198                  | 100                         |
| YvcR       | 29020       | 6,32 | 10            | 261                  | 100                         |
| YvIB       | 41055       | 5,5  | 15            | 123                  | 100                         |
|            |             |      |               |                      |                             |

\*identified with nanoUPLC-ESI-MS/MS with a Synapt G2S mass spectrometer. The PLGS score is given.
