# Supplementary material
Source: PubMed Central journal article supplement (PMC4002112)
Supplement: supp_M113.537449_jbc.M113.537449-2.pdf [file supp_M113.537449_jbc.M113.537449-2.pdf]

Table S2: Structural statistics

|                                             |                     |
|---------------------------------------------|---------------------|
| No. of NOEs                                 | 35                  |
| No. of PRE constraints                      |                     |
| Upper distance limits                       | 11                  |
| Lower distance limits                       | 24                  |
| Residual Target Function<br>(CYANA)         | 0.04 Å <sup>2</sup> |
| Force Field Energy (YASARA)                 | -34453±1070 kJ/mol  |
| Violation Energy (YASARA)                   | 4.1 kJ/mol          |
| Max. distance violation                     | 0.1 Å               |
| RMSD N, C <sup>α</sup> , C', S <sup>γ</sup> |                     |
| res 1-24                                    | 2.95± 0.66 Å        |
| res 8-12 (ring B)                           | 0.95± 0.17 Å        |
| res 13-24 (rings C,D,E)                     | 1.72± 0.35 Å        |
